# Supplementary figures and images for: Microfluidics made of yarns and knots: from fundamental properties to simple networks and operations
Source: Royal Society of Chemistry journal article supplement (doi:10.1039/c1lc20336c), 2011-01-01

Safavieh et al.

Figure  
S1

A

| yellow | blue |
|--------|------|
| 100%   | 0%   |
| 80%    | 20%  |
| 60%    | 40%  |
| 40%    | 60%  |
| 20%    | 80%  |
| 0%     | 100% |

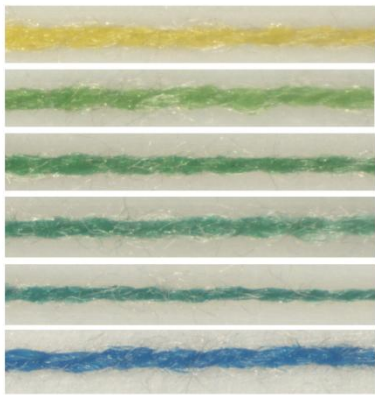

B

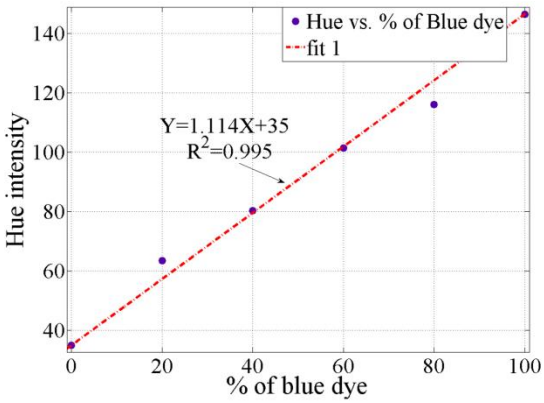

Supplement: c1lc20336c_2.pdf [file c1lc20336c_2.pdf]

**Figure  
S2**

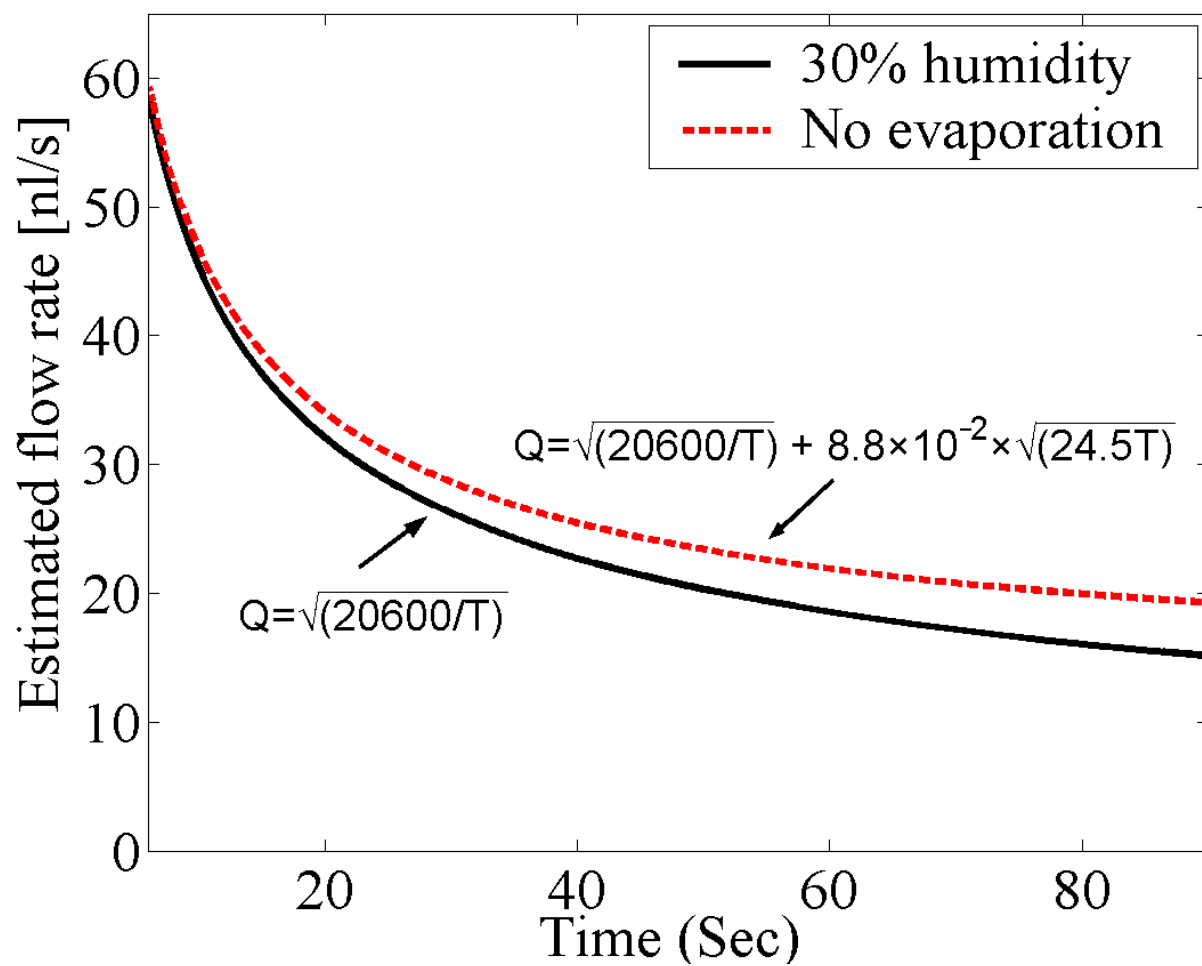

Supplement: c1lc20336c_3.pdf [file c1lc20336c_3.pdf]

Safavieh et al.

## Figure S3

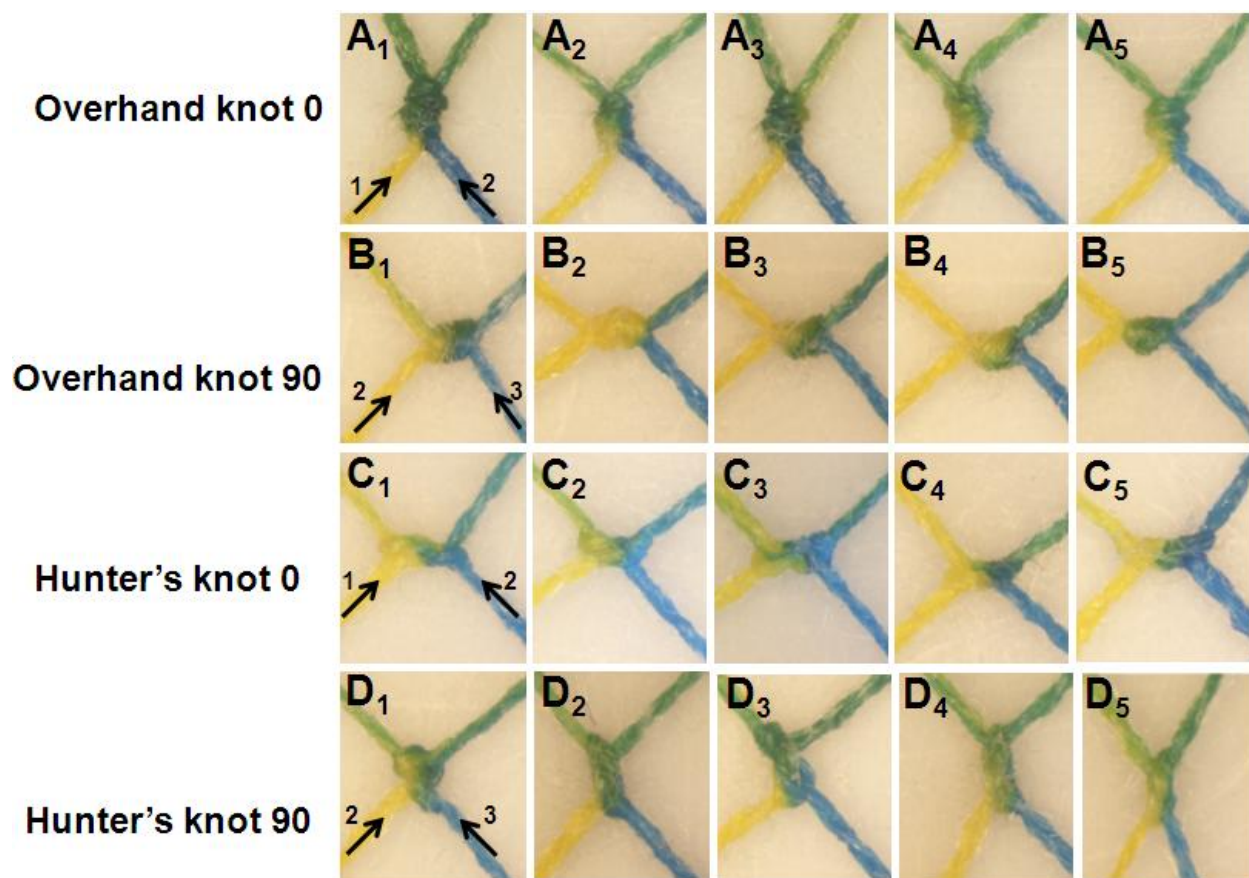

Supplement: c1lc20336c_4.pdf [file c1lc20336c_4.pdf]

Safavieh et al.

Figure

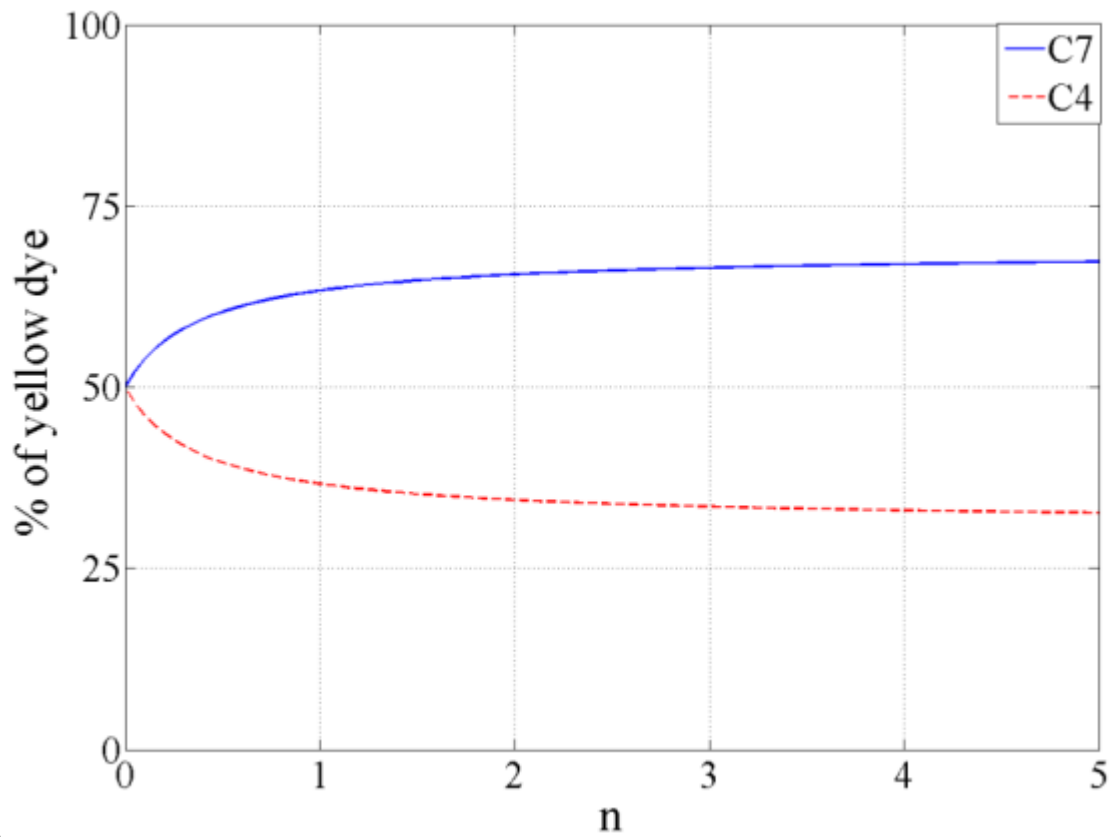

S4

Supplement: c1lc20336c_5.pdf [file c1lc20336c_5.pdf]
